# Supplementary material for: Molecularly imprinted polymer based on CdTe@SiO2 quantum dots as a fluorescent sensor for the recognition of norepinephrine
Source: Royal Society of Chemistry journal article supplement (doi:10.1039/c4an00951g), 2014-01-01
Supplement: c4an00951g1.pdf [file c4an00951g1.pdf]

### Optimization of the recognition conditions

1. The influence of solvent on the degree of fluorescence quenching

| solvent                         | DDW   | methanol | ethanol | chloroform |
|---------------------------------|-------|----------|---------|------------|
| $K_{sv}$ ( $L \cdot mol^{-1}$ ) | 60500 | 45071    | 36513   | 18025      |

2. The influence of reaction time on the degree of fluorescence quenching

| time (min)                      | 0     | 5     | 10    | 15    | 20    | 30    |
|---------------------------------|-------|-------|-------|-------|-------|-------|
| $K_{sv}$ ( $L \cdot mol^{-1}$ ) | 31006 | 45698 | 50152 | 59338 | 51352 | 43600 |

3. The influence of pH value on the degree of fluorescence quenching

| pH                              | 6.00  | 7.00  | 7.40  | 8.00  | 8.50  |
|---------------------------------|-------|-------|-------|-------|-------|
| $K_{sv}$ ( $L \cdot mol^{-1}$ ) | 25409 | 37090 | 40768 | 38099 | 32011 |
